# Supplementary material for: An autoimmune disease risk SNP, rs2281808, in SIRPG is associated with reduced expression of SIRPγ and heightened effector state in human CD8 T-cells
Source: PubMed Central journal article supplement (PMC6194019; doi:10.1038/s41598-018-33901-1), 2018-10-18
Supplement: 41598_2018_33901_MOESM1_ESM.pdf [file 41598_2018_33901_MOESM1_ESM.pdf]

**An autoimmune disease risk SNP, rs2281808, in SIRPG is associated with reduced expression of SIRP $\gamma$  and heightened effector state in human CD8 T-cells**

Sushmita Sinha<sup>1\*</sup>, Nicholas Borcharding<sup>1</sup>, Pranav S. Renavikar<sup>1</sup>, Michael P. Crawford<sup>1</sup>, Eva Tsalikian<sup>2</sup>, Michael Tansey<sup>2</sup>, Ezzatollah T. Shivapour<sup>3</sup>, Frank Bittner<sup>3</sup>, John Kamholz<sup>3</sup>, Heena Olalde<sup>3</sup>, Emilee Gibson<sup>3</sup> and Nitin J. Karandikar<sup>1</sup>

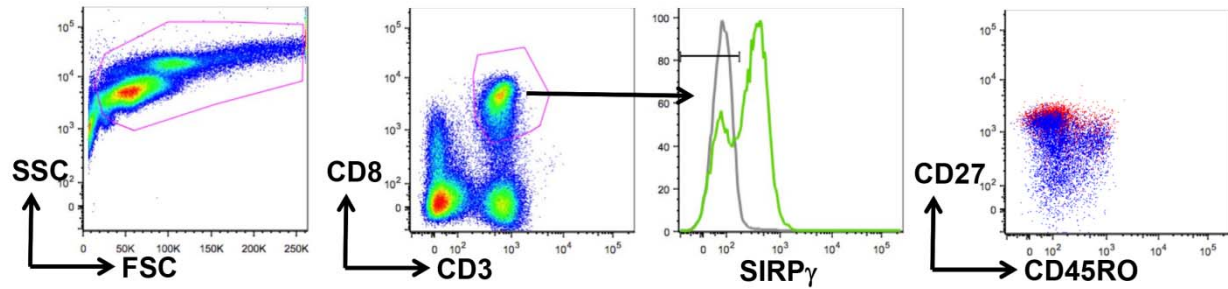

**Supplementary Fig 1.** Gating strategy for Fig 2. Live gated lymphocytes were gated on CD3+ CD8 T cells. SIRP $\gamma$  expression on CD8 T cells was analyzed and SIRP $\gamma$  low CD8 T-cells were gated. SIRP $\gamma$  low CD8 T-cells were then overlaid over total CD8 T-cells displayed in the dot plot showing CD27 and CD45RO.

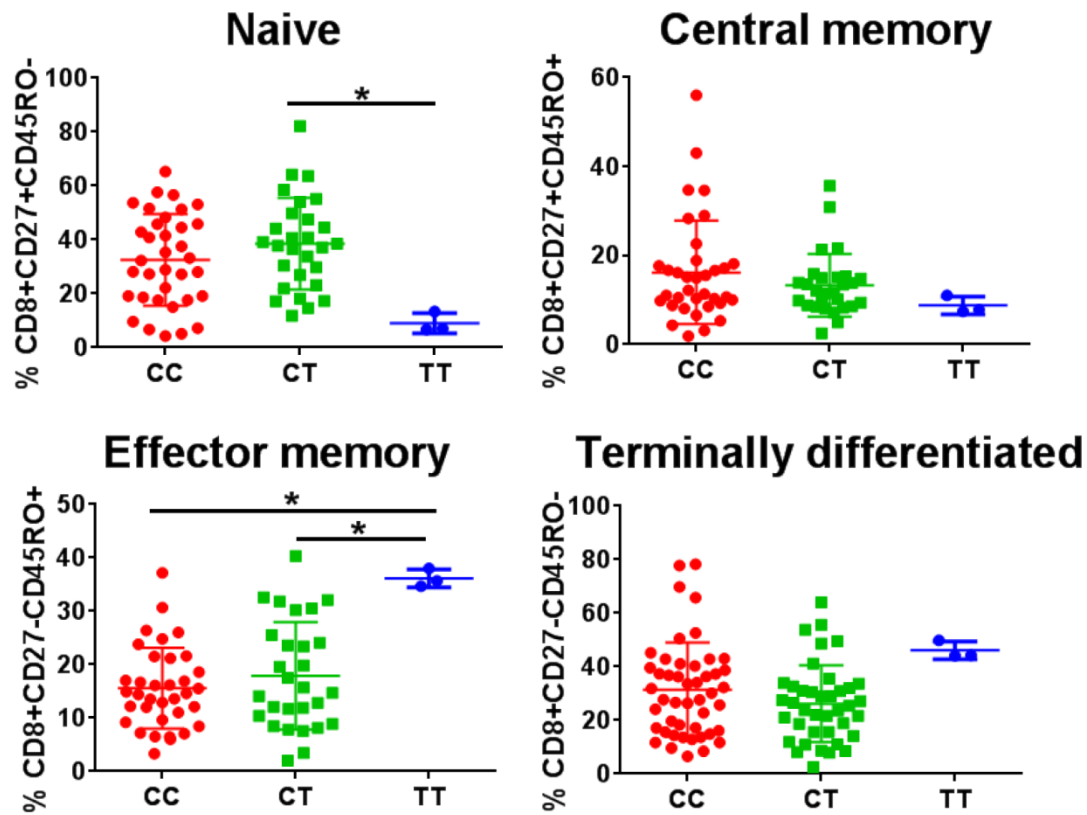

**Supplementary Fig 2.** CD8 T cell subsets with respect to rs2281808 genotype. PBMC samples were genotyped for rs2281808 by TaqMan PCR. PBMC samples were also subjected to flow cytometry staining. Gated CD3+CD8+ T-cells were analyzed for naïve (CD27+CD45RO-), central memory (CD27+CD45RO+), effector memory (CD27-CD45RO+), and terminally differentiated markers (CD27-CD45RO-) and plotted with respect to their rs2281808 genotype status. One-way ANOVA with Tukey's posthoc was performed and  $p < 0.05$  was considered significant.

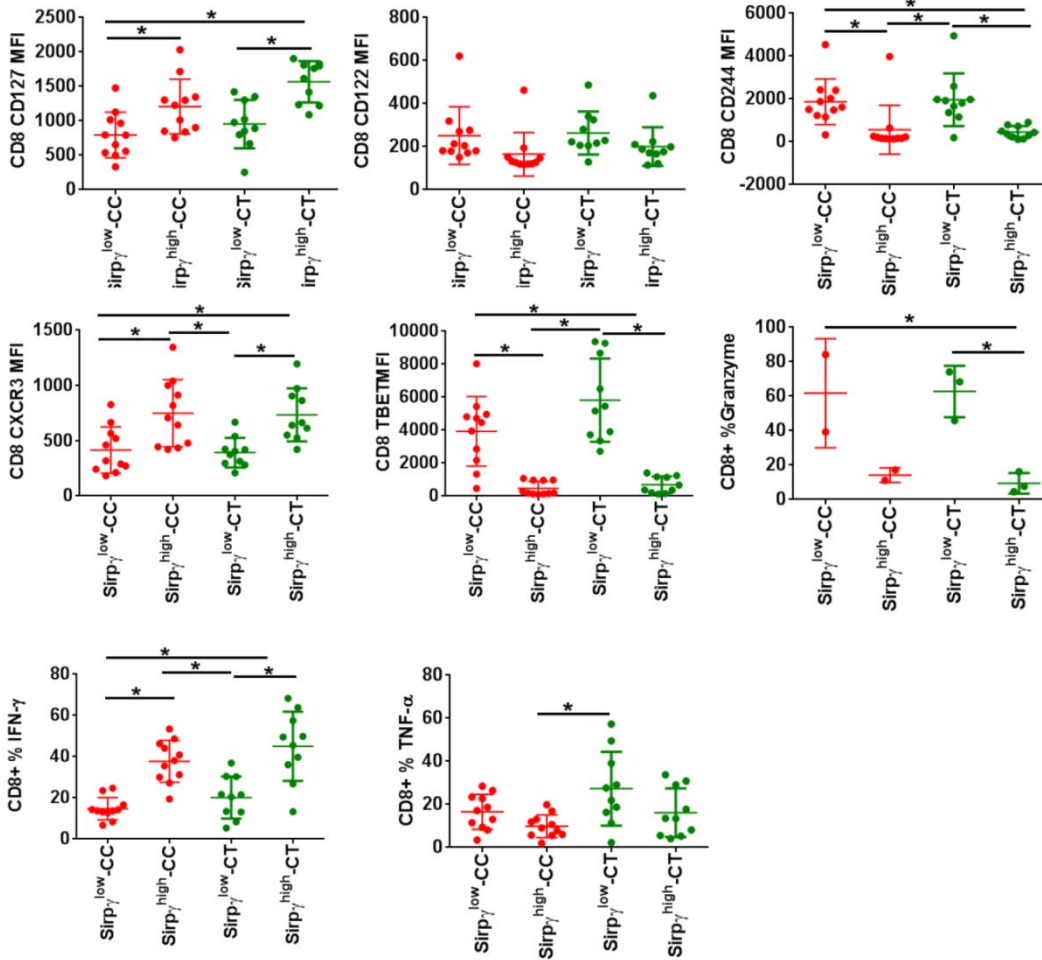

**Supplementary Fig 3.** Phenotypic profile of SIRP $\gamma$ -high vs. low CD8 T-cells from CC and CT carriers are displayed separately. CD8 T-cells from CC, CT and TT carriers were evaluated for their expression of the indicated molecules by flow cytometry. Intracellular staining was performed for T-bet. In case of CC and CT, cells were gated for SIRP $\gamma$ -high vs. low cells. PBMC samples from CC and CT carriers were stimulated with PMA/Ionomycin/brefeldin A for 5 hr before intracellular staining for IFN- $\gamma$  and TNF- $\alpha$ . CD8 T-cells from CC and CT carriers were gated on SIRP $\gamma^{\text{low}}$  vs high cells for and evaluated for frequency of cells producing the indicated

cytokines. 1-way ANOVA with Tukey's posthoc analysis was performed and  $p < 0.05$  was considered significant.
